# Supplementary material for: Association of the PPAR-γ Gene with Altered Glucose Levels and Psychosis Profile in Schizophrenia Patients Exposed to Antipsychotics
Source: PubMed Central journal article supplement — Psychiatry Investig. 2014 Apr 11;11(2):179–85. doi: 10.4306/pi.2014.11.2.179 (PMC4023093; doi:10.4306/pi.2014.11.2.179), 2014-04-11
Supplement: pi-11-179-s001.pdf [file pi-11-179-s001.pdf]

**Supplementary Table 1.** Information of peroxisome proliferator activated receptor- $\gamma$  (PPAR- $\gamma$ ) single nucleotide polymorphisms (SNPs) used in this study. Valid SNPs used in statistical analysis are marked with #

| SNP             | rs number  | Position on chr3 | Intervening seq. & exon | Nucleotide change | Minor allele | MAF   | Amino acid change |
|-----------------|------------|------------------|-------------------------|-------------------|--------------|-------|-------------------|
| 1 <sup>#</sup>  | rs6785890  | 12335816         | 5'UTR                   | A/C               | C            | 0.475 | -                 |
| 2 <sup>#</sup>  | rs12631819 | 12342861         | 5'UTR                   | G/T               | T            | 0.321 | -                 |
| 3               | rs7620165  | 12344441         | 5'UTR                   | A/G               | G            | 0.025 | -                 |
| 4 <sup>#</sup>  | rs10510410 | 12346738         | 5'UTR                   | A/C               | C            | 0.320 | -                 |
| 5 <sup>#</sup>  | rs13061415 | 12349924         | 5'UTR                   | C/T               | C            | 0.383 | -                 |
| 6 <sup>#</sup>  | rs12485478 | 12351223         | 5'UTR                   | A/G               | G            | 0.269 | -                 |
| 7               | rs9310401  | 12352468         | 5'UTR                   | C/T               | T            | 0.415 | -                 |
| 8               | rs17793951 | 12370737         | 5'UTR                   | A/G               | G            | 0.015 | -                 |
| 9 <sup>#</sup>  | rs12496005 | 12371082         | 5'UTR                   | C/G               | C            | 0.383 | -                 |
| 10 <sup>#</sup> | rs12490265 | 12384542         | 5'UTR                   | A/G               | A            | 0.170 | -                 |
| 11 <sup>#</sup> | rs1801282  | 12393125         | Exon B                  | C/G               | G            | 0.047 | Pro12Ala          |
| 12 <sup>#</sup> | rs17817276 | 12397392         | Intron B                | A/G               | G            | 0.111 | -                 |
| 13              | rs2938397  | 12408278         | Intron B                | A/G               | G            | 0.293 | -                 |
| 14 <sup>#</sup> | rs13306745 | 12421056         | Intron B                | G/T               | T            | 0.079 | -                 |
| 15              | rs1805192  | 12421238         | Exon 1                  | C/G               | G            | 0     | Pro12Ala          |
| 16              | rs1800571  | 12422848         | Exon 2                  | A/C               | A            | 0     | Gln85Pro          |
| 17 <sup>#</sup> | rs4135268  | 12437237         | Intron 3                | C/G               | G            | 0.044 | -                 |
| 18 <sup>#</sup> | rs2959272  | 12442833         | Intron 3                | T/G               | T            | 0.373 | -                 |
| 19 <sup>#</sup> | rs1875796  | 12443657         | Intron 3                | C/T               | C            | 0.441 | -                 |
| 20 <sup>#</sup> | rs4135275  | 12443844         | Intron 3                | A/G               | G            | 0.469 | -                 |
| 21 <sup>#</sup> | rs12489347 | 12443877         | Intron 3                | C/G               | C            | 0.383 | -                 |
| 22              | rs4135352  | 12458208         | Exon 5                  | C/T               | T            | 0     | Phe247Phe         |
| 23 <sup>#</sup> | rs13306747 | 12458274         | Exon 5                  | C/G               | G            | 0.057 | Pro269Pro         |
| 24              | rs28936407 | 12458330         | Exon 5                  | A/G               | A            | 0     | His288Arg         |
| 25              | rs13306746 | 12458334         | Exon 5                  | A/G               | T            | 0     | Ser289Ser         |
| 26 <sup>#</sup> | rs1175544  | 12467044         | Intron 5                | C/T               | T            | 0.362 | -                 |
| 27              | rs28763894 | 12475440         | Exon 6                  | A/G               | G            | 0     | Gln410Gln         |
| 28              | rs41516544 | 12475497         | Exon 6                  | A/G               | G            | 0     | Ser429Ser         |
| 29 <sup>#</sup> | rs3856806  | 12475557         | Exon 6                  | C/T               | T            | 0.212 | His449His         |

Genotype distributions of SNP-7 and -13 deviated from the Hardy-Weinberg Equilibrium. SNP-3 and -8 had MAFs of 0.025 and 0.015, while SNP-15, -16, -22, -24, -25, -27 and -28 were monomorphic. Chr.: chromosome, seq.: sequence, MAF: minor allele frequency, 5'UTR: 5'untranslated region
