# Supplementary material for: Association of the PPAR-γ Gene with Altered Glucose Levels and Psychosis Profile in Schizophrenia Patients Exposed to Antipsychotics
Source: PubMed Central journal article supplement — Psychiatry Investig. 2014 Apr 11;11(2):179–85. doi: 10.4306/pi.2014.11.2.179 (PMC4023093; doi:10.4306/pi.2014.11.2.179), 2014-04-11
Supplement: pi-11-179-s002.pdf [file pi-11-179-s002.pdf]

**Supplementary Table 2.** Eleven haplotypes derived from 6 selected single nucleotide polymorphisms

| Haplotype | Alleles     | Freq.  | S.E.   | 95% CI        |
|-----------|-------------|--------|--------|---------------|
| 1         | A-G-G-T-A-C | 0.0000 | 0.0001 | 0.0000–0.0003 |
| 2         | G-G-G-T-A-C | 0.0006 | 0.0009 | 0.0000–0.0025 |
| 3         | G-G-G-T-G-C | 0.0033 | 0.0021 | 0.0000–0.0075 |
| 4         | A-G-T-C-A-C | 0.0060 | 0.0028 | 0.0005–0.0115 |
| 5         | A-G-G-T-G-C | 0.0068 | 0.0030 | 0.0010–0.0127 |
| 6         | G-A-G-T-G-T | 0.0095 | 0.0035 | 0.0026–0.0165 |
| 7         | G-A-T-C-A-C | 0.0157 | 0.0045 | 0.0068–0.0246 |
| 8         | G-A-G-T-A-C | 0.1005 | 0.0110 | 0.0790–0.1220 |
| 9         | A-G-T-C-A-T | 0.1016 | 0.0110 | 0.0800–0.1232 |
| 10        | G-A-T-C-A-T | 0.2746 | 0.0163 | 0.2427–0.3065 |
| 11        | G-A-G-T-G-C | 0.4814 | 0.0182 | 0.4457–0.5171 |

Freq: frequency, SE: standard error, 95% CL: 95% Confidence Limits
